# Supplementary material for: Detecting Carbapenemases in Animal and Food Samples by Droplet Digital PCR
Source: MDPI journal article supplement (doi:10.3390/antibiotics11121696), 2022-11-25
Supplement: s1 [file s1]

Table S1. Results of the statistical analysis by sample type

| Sample type                                                    | p-value   |
|----------------------------------------------------------------|-----------|
| All                                                            | <2,20E-22 |
| Faeces (livestock animals)<br>vs<br>Faeces (companion animals) | <2,20E-16 |
| Faeces (livestock animals)<br>vs<br>Meat (livestock animals)   | 1,44E-11  |
| Faeces (livestock animals)<br>vs<br>Bivalve molluscs           | 0,0086    |
| Faeces (companion animals)<br>vs<br>Meat (livestock animals)   | 0,4       |
| Faeces (companion animals)<br>vs<br>Bivalve molluscs           | 4,45E-05  |
| Meat (livestock animals)<br>vs<br>Bivalve molluscs             | 0,002     |

Table S2. Results of the statistical analysis by resistance genes

| Resistance genes                                                     | p-value  |
|----------------------------------------------------------------------|----------|
| All                                                                  | <2.2e-16 |
| <i>bla</i> <sub>KPC</sub><br>vs<br><i>bla</i> <sub>OXA-48-like</sub> | <2.2e-16 |
| <i>bla</i> <sub>KPC</sub><br>vs<br><i>bla</i> <sub>VIM</sub>         | 1        |
| <i>bla</i> <sub>OXA-48-like</sub><br>vs<br><i>bla</i> <sub>VIM</sub> | <2.2e-16 |
